# Supplementary figures and images for: Correction of unexpected distributions of P values from analysis of whole genome arrays by rectifying violation of statistical assumptions
Source: Springer Nature journal article supplement (doi:10.1186/1471-2164-14-161), 2013-01-01

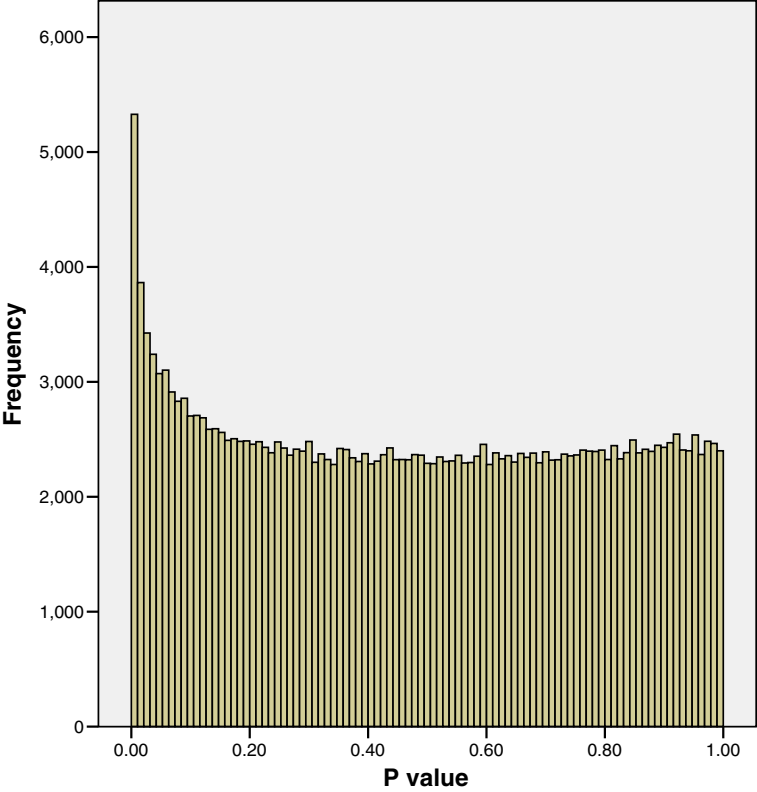

Supplement: 12864_2012_4856_MOESM1_ESM.pdf [file 12864_2012_4856_MOESM1_ESM.pdf]
